# Supplementary material
Source: PubMed Central journal article supplement (PMC5338448)
Supplement: pnas.1616255114.sapp.pdf [file pnas.1616255114.sapp.pdf]

## Supplemental Information for:

### A Hypothalamic circuit that controls body temperature.

Zheng-Dong Zhao<sup>a,b,c,1</sup>, Wen Z. Yang<sup>a,b,c,1</sup>, Cuicui Gao<sup>a,b,c</sup>, Xin Fu<sup>a,b,c</sup>, Wen Zhang<sup>d</sup>, Qian Zhou<sup>a,b,c</sup>, Wanpeng Chen<sup>a,b,c</sup>, Xinyan Ni<sup>c</sup>, Jun-Kai Lin<sup>d</sup>, Juan Yang<sup>c</sup>, Xiao-Hong Xu<sup>d</sup>, Wei L. Shen<sup>c,2</sup>.

**a**, School of Life Science and Technology, ShanghaiTech University, Shanghai, 210210, China.

**b**, Institute of Neuroscience, Shanghai Institutes for Biological Sciences, Chinese Academy of Sciences, Shanghai, 200031, China

**c**, University of Chinese Academy of Sciences, Beijing, 100049, China.

**d**, Institute of Neuroscience, State Key Laboratory of Neuroscience, CAS Center for Excellence in Brain Science and Intelligence Technology, Shanghai Institutes for Biological Sciences, Chinese Academy of Sciences, Shanghai, 200031, China

1, These authors contributed equally. The order was decided by coin toss.

2, Corresponding author: W.L.S: [shenwei@shanghaitech.edu.cn](mailto:shenwei@shanghaitech.edu.cn).

## Supplemental Materials and Methods

### Surgeries

We delivered ~0.2  $\mu$ l (unless specified) of AAV virus through a pulled-glass pipette and a pressure micro-injector (Nanoject II, #3-000-205A, Drummond). The injection coordinates were calculated according to Paxinos & Franklin mice brain coordinates (2<sup>nd</sup> edition) and the injection was performed using a small animal stereotaxic instrument (David Kopf Instruments, #PF-3983) under general anesthesia by isoflurane. A feedback heater was used to keep mice warm during surgeries. Mice were recovered in a warm bracket before there were transferred to housing cages for 2–4 weeks before performing behavioral evaluations. The fiber optic cables (200  $\mu$ m in diameter, AniLab Co., China) were chronically implanted and secured with dental cement. For cholera toxin B subunit (CTb) injections, 150 nl of CTb conjugated with Alexa Fluor-488 dye (Invitrogen, #C22841) were stereotaxically injected to the DMD. Animals were sacrificed for histology 5 days after the injection.

## **Immunohistochemistry**

Mice were transcardially perfused with PBS, followed by 4% PFA. Brains were then post-fixed overnight at 4 °C. Fixed brains were sectioned using a vibratome (Leica) to a thickness of 50 µm. Brain slices were incubated with primary antibodies for 12–24 h at 4 °C, followed by 3x washes in PBST (PBS with 0.1% Triton X-100, vol/vol) before incubation in secondary antibodies for 2 h at room temperature. Primary antibodies used were: rabbit anti-cFos (1:20, 000, Synaptic systems, #226003), chicken anti-GFP (1:1000, Abcam, #ab13970), rat anti-Tdt (1:1000, Chromotek, #5f8), rabbit anti-phospho-ribosomal protein S6 pSer244/pSer247 (1:1000, Invitrogen, #44-923). Antibodies were incubated in blocking buffer (PBS containing 2.5 % normal goat serum (vol/vol), 1.5 % Bovine serum albumin (weight/vol), 0.1% Triton™ X-100 (vol/vol) and 0.05% NaN<sub>3</sub> (weight/vol)). Secondary antibodies were Alexa Fluor-conjugated (Invitrogen). For pSTAT3 staining, slices were permeabilized for 10 min at –20°C in 100% methanol before immunostaining with rabbit anti-pSTAT3 (1:1000, Cell Signaling, #9145P). Images were captured on a Zeiss LSM710 confocal microscope or Olympus VS120 Virtual Microscopy Slide Scanning System.

## **Behavioral assays**

Body temperature, oxygen consumption, and physical activity were monitored by Comprehensive Lab Animal Monitoring System with Temperature Telemetry Transmitter (Columbus, with G2 E-Mitter transponders). The counts of physical activity normalized to a 2-min interval per data point were shown in all figures. Temperature transponders were implanted into the peritoneal cavity 4–7 days before testing. Stimuli (light, drugs, or temperature) were delivered between 10 am and 3 pm in the dark phase. Mice were adapted in the metabolic chambers for 2 days before giving saline (volume (µl) = 10 x

body weight (grams) ), CNO (ENZO, #BML-NS105-0025, i.p., 1.5 mg/kg body weight), or optogenetic stimulation (473 nm or 532 nm laser, AniLab). Stimulation protocol: for ChR2, bilateral or unilateral, light pulses for 2 s (10 mW, 20 Hz, 40%) followed by a 2-s break, with the sequence repeating for 30 min or 60 min as indicated; for hGtACR1, bilateral, light on for 30 s (473 nm, 10 mW except in Fig. 1D (6 mW)) followed by a 90-s break, with the sequence repeating for 30 min or 60 min as indicated.

### **Electrophysiological recordings**

Adult mice were anesthetized with isoflurane, perfused transcardially with ice-cold oxygenated (95% O<sub>2</sub>/5% CO<sub>2</sub>) high-sucrose solution (2.5 mM KCl, 1.25 mM NaH<sub>2</sub>PO<sub>4</sub>, 2 mM Na<sub>2</sub>HPO<sub>4</sub>, 2 mM MgSO<sub>4</sub>, 213 mM sucrose, 26 mM NaHCO<sub>3</sub>), and decapitated to remove the brain. After removal, the brain was immediately placed in ice-cold oxygenated high-sucrose solution and sectioned in coronal plane at 250 μm in this buffer using a vibratome (VT1200 S, Leica). After section, the slices were incubated in oxygenated aCSF (126 mM NaCl, 2.5 mM KCl, 1.25 mM NaH<sub>2</sub>PO<sub>4</sub>, 1.25 mM Na<sub>2</sub>HPO<sub>4</sub>, 2 mM MgSO<sub>4</sub>, 10 mM Glucose, 26 mM NaHCO<sub>3</sub>, 2 mM CaCl<sub>2</sub>) at 34°C for 1 h. The intracellular solution for action potential (spike) recordings contains 130 mM K-gluconate, 2 mM MgSO<sub>4</sub>, 10 mM NaCl, 0.2 mM EGTA, 10 mM HEPES, 10 mM phosphocreatine, 4 mM Tris-ATP and 0.5 mM Na<sub>3</sub>-GTP (pH:7.3, 297 mOsm). The intracellular solution for IPSC recordings contains 125 mM CsCl, 5 mM NaCl, 0.6 mM EGTA, 10 mM HEPES, 4 mM Mg-ATP, 0.3 mM Na<sub>3</sub>-GTP and 10 mM lidocaine hydrochloride (QX-314) (pH:7.3, 280 mOsm). For IPSC recordings, cells were clamped at 0 mV. 10 μM CNQX (Sigma) and 50 μM DL-AP5 (Sigma) were applied to the bath solution. To block IPSCs, 25 μM bicuculline (Tocris) was applied to the bath solution. All recordings were acquired using Multiclamp 700B amplifier and Digidata 1440A interface (Molecular Devices).

## **Fiber photometry**

Following injection of a AAV5-Syn-Flex-GCaMP6f viral vector, an optical fiber (200  $\mu\text{m}$  O.D., 0.37 numerical aperture, Thorlabs) was placed 200 $\mu\text{m}$  above the viral injection site. Post-surgery, mice were caged individually and allowed to recover for at least 2 weeks before any studies were performed. Fluorescence signals were acquired with a dual-channel fiber photometry system (Fscope, Biolinkoptics, China) equipped with a 488-nm excitation laser (OBIS, Coherent), 505-544 nm emission filter and a photomultiplier tube (R3896, Hamamatsu). The gain (voltage) on PMT was set to 600 V. The laser power at the tip of optical fiber was adjusted to as low as possible ( $\sim 25 \mu\text{W}$ ) to minimize bleaching. The analogue voltage signals fluorescent were low-pass (30 Hz) filtered and digitalized at 100 Hz, which were then recorded by Fscope software (Biolinkoptics). The temperature was monitored using T-type thermocouples and was recorded simultaneously with the fluorescent signals by Fscope software. An optical fiber (RJPSF2, Thorlabs) with integrated rotary joint preventing fiber damage from animal movement was used to guide the light between the fiber photometry system and the implanted optical fiber. The floor (15 x 15 cm) temperature for each individual mouse was controlled by a Peltier controller (#5R7-001, Oven Industry) with customized Labview code (National Instrument, ref. (1)).

We segmented the data based on behavioral events within individual trials. We derived the values of fluorescence change ( $\Delta F/F$ ) by calculating  $(F-F_0)/F_0$ , where  $F_0$  is the baseline fluorescence signal averaged over a 120-s-long control time window, which was typically set 0.5 s preceding the trigger events. Similar data processing has been described in (2).

## Single cell Reverse Transcription PCR

Single cell RT-PCR was carried out using established procedures. First, a cDNA library of the transcriptome of individual cells after recording was generated using random hexamers and the SuperScript IV kit (Invitrogen, #18091050) according to the manufacturer's protocol, K-gluconate or CsCl inner solution was performed as negative control. Second, multiplex PCR was carried out with 2xTaq PCR MasterMix (Tiangen, #KT201-02) and primers for the 3 genes using the entire cDNA library from step 1 in a volume of 25  $\mu$ l. Multiplex primers were designed to amplify exonic DNA sequences which spanned at least one exon-intron boundary. Multiplex PCR conditions were 60°C annealing temperature with 1 min elongation time using 40 cycles. Water control experiments were regularly performed to control for traces of contamination. Third, nested single gene PCR was carried out in a volume of 25  $\mu$ l with a 1:50 dilution of the multiplex PCR reaction using the standard 2x Taq PCR MasterMix (Tiangen, #KT201-02). Nested primers were designed to amplify 100–400 bp DNA sequences within the multiplex PCR primer boundaries. Nested PCR conditions were 60°C annealing temperature with 30-s elongation time using 35 cycles. PCR products were visualized and documented using standard agarose gel electrophoresis with UV light. Primers were tested with dilutions of cDNA libraries from POA (3). The following primers are used.

| genes                     | multiplex primer sequence | nested primer sequence |
|---------------------------|---------------------------|------------------------|
| vgat<br>(137 bp)          | GTCACGACAAACCCAAGATCAC    | GTCACGACAAACCCAAGATCAC |
|                           | GGCGAAGATGATGAGGAACAAC    | GGCGAAGATGATGAGGAACAAC |
| vglut2<br>(891 bp,313 bp) | AGGGTTCGATGACGTTTCTGG     | CTATTAGGAAACCCGTGGGCTG |
|                           | AGCGGATGCCGAAGGATATG      | CTTCTTCTCCAGCACCTGTGA  |
| gapdh<br>(500 bp,138 bp)  | ACCACAGTCCATGCCATCAC      | GGTTGTCTCCTGCGACTTCA   |
|                           | GGGTGGTCCAGGGTTTCTTA      | TCCACCACCCTGTTGCTGTA   |

Note: The multiplex PCR and nested PCR of vgat shared the same primers with (4), while all the rest primers were self-designed via NCBI primer-blast.

### **PhosphoTRAP and mRNA sequencing**

The procedure of ribosome immunoprecipitation using anti-pS6 antibody was similar as described in (5), except we used the same antibody (rabbit anti-S6(pSpS244/247), Invitrogen, #44-923) for both staining and immunoprecipitation. We did not use any blocking peptides during immunoprecipitation since this pS6 antibody recognized the last two phosphorylation sites at the C terminal, which has less background than the one used in (5). Briefly, we loaded Protein A Dynabeads (150  $\mu$ L, Invitrogen, #10002D) with 4  $\mu$ g of pS6 antibody (Invitrogen, #44-923) in Buffer A (10 mM HEPES [pH 7.4], 150 mM KCl, 5 mM MgCl<sub>2</sub>, 1% NP40, 0.05% IgG-free BSA) at 4 °C. Beads were washed three times with Buffer A immediately before use.

Control (29 °C) or temperature challenged (38 °C) mice were sacrificed by cervical dislocation. The anterior hypothalamus in between Bregma = 0.5 and 0.0 was rapidly dissected in Buffer B on ice (1x HBSS, 4 mM NaHCO<sub>3</sub>, 2.5 mM HEPES [pH 7.4], 35 mM Glucose, 100  $\mu$ g/ml cycloheximide). Hypothalami were pooled (typically 6-8 per IP), transferred to a glass homogenizer, and resuspended in 1 ml of buffer C (10 mM HEPES [pH 7.4], 150 mM KCl, 5 mM MgCl<sub>2</sub>, 100 nM calyculin A, 2 mM DTT, 100 U/ml RNasin, 100  $\mu$ g/ml cycloheximide, protease and phosphatase inhibitor cocktails). Samples were homogenized manually. Homogenates were transferred to a microcentrifuge tube and clarified at 2,000x g for 10 min at 4°C. To 1.0 mL supernatant, add 100  $\mu$ L of 10% NP40 and 100  $\mu$ L of 1,2-diheptanoyl-sn-glycero-3-phosphocholine (DHPC, Avanti Polar Lipids: 100 mg/0.69 ml). Mix by inversion and incubate on ice for 5 min. This solution was mixed and then clarified at 17000x g for 20 min at 4 °C. The resulting high-speed supernatant

was transferred to a new tube. A 20  $\mu$ l aliquot of this solution was removed, transferred to a new tube containing 350  $\mu$ l buffer RLT (QIAGEN), and stored at -80°C for purification as input RNA. The remainder was used for immunoprecipitation. Immunoprecipitations were allowed to proceed 10 min at 4°C. The beads were then washed four times with buffer D (10 mM HEPES [pH 7.4], 350 mM KCl, 5 mM MgCl<sub>2</sub>, 0.5 mM DTT, 1% NP40, 100 U/ml RNasin, and 100  $\mu$ g/ml cycloheximide). After the final wash the RNA was eluted by addition of buffer RLT (350  $\mu$ L) to the beads on ice, the beads removed by magnet, and the RNA purified using the RNeasy Micro Kit (QIAGEN). The RNA integrity number (RIN) was assessed using an Agilent 2100 bioanalyzer. Only samples with RIN > 7.5 were processed further.

For RNA-seq analysis, cDNA was prepared using the SMARTer Ultralow Input RNA for Illumina Sequencing Kit (Clontech, #634935). Paired-end libraries were synthesized by using the TruSeq™ RNA Sample Preparation Kit (Illumina, USA) following TruSeq™ RNA Sample Preparation Guide. Briefly, the poly-A containing mRNA molecules were purified using poly-T oligo-attached magnetic beads. Following purification, the mRNA was fragmented into small pieces using divalent cations under 94°C for 8 min. The cleaved RNA fragments were copied into first strand cDNA using reverse transcriptase and random primers. This was followed by second strand cDNA synthesis using DNA polymerase I and RNase H. These cDNA fragments then went through an end repair process, the addition of a single 'A' base, and then ligation of the adapters. The products were then purified and enriched with PCR to create the final cDNA library. Purified libraries were quantified by Qubit® 2.0 Fluorometer (Life Technologies, USA) and validated by Agilent 2100 bioanalyzer (Agilent Technologies, USA) to confirm the insert size and calculate the mole concentration. Cluster was generated by cBot with the library diluted to 10 pM and then was sequenced on the Illumina HiSeq 2500 (Illumina, USA). The library

construction and sequencing was performed by Shanghai Biotechnology Corporation (China).

### **Data analysis**

The RNA quantification data after sequencing was analyzed in two steps. First the RNA in the IP for each gene was divided by the input, to determine the fold-enrichment (IP/Input). This analysis was performed separately for 38 °C and 29 °C groups. To calculate the differential enrichment, the fold-enrichment values for 38 °C group were then divided by the fold-enrichment values for the 29 °C group from the same day. The top candidate genes were then selected for further quantitative PCR analysis and validated by RNA in situ with heat-induced cFos staining.

### **RNA Fluorescent in situ hybridization (FISH)**

RNA probes against Vgat, Vglut2, GAD67 and BDNF were constructed according to the description on Allen Brain Atlas (<http://www.brain-map.org>). The primers used for probe cloning were as follows:

Vgat (Forward, GCCATTCAGGGCATGTTC; reverse, AGCAGCGTGAAGACCACC),

Vglut2 (Forward, CCAAATCTTACGGTGCTACCTC, reverse,

AGCCATCTTTCCTGTTCCACT), GAD67 (Forward, TGTGCCCAAACCTGGTCCT;

reverse, TGGCCGATGATTCTGGTT), BDNF (Forward, CGACGACATCACTGGCTG;

reverse, CGGCAACAAACCACAACA).

All probes were cloned from mouse brain cDNA and ligated into pGM-T vector (TianGen, #VT202). The RNA probes labeled by digoxigenin-UTP (Roche, #112770739) or Fluorescein-UTP (Roche, #11685619910) were generated by in vitro transcription (T7 RNA Polymerase, Promega, #P2077). For FISH, mice were transcardially perfused with



DEPC-PBS, followed by 4% PFA. Brains were then post-fixed overnight at 4 °C and vibratome sectioned. 40 µm free-floating sections were washed sequentially with PBS and PBS containing 0.1% Tween 20 (0.1% PBSTw) for 10 min and quenched with 0.5% H<sub>2</sub>O<sub>2</sub> (vol/vol) in PBS for 30min followed by wash with 0.1% PBSTw for 10 min. Then they were premeabilized with 0.5% Triton X-100 in 2 × SSC for 20 min, followed by another round of wash with 0.1% PBSTw for 10 min. Slices were acetylated by 0.25% acetic anhydride (vol/vol) in 0.1 M triethanolamine (pH 8.0) for 10 min, followed by two rounds of washing with PBS for 10min. Afterward, sections were incubated in pre-hybridization solution (50% formamide (vol/vol), 5× SSC, 0.1% Tween 20 (vol/vol), 0.1% 3-[(3-cholamidopropyl) dimethylammonio]-1-propanesulfonate (CHAPS, wt/vol) and 5 mM EDTA) for 2 hours in 60 °C water bath, and then incubated in the hybridization solution (pre-hybridization solution plus 0.3 mg/ml yeast tRNA, 100 mg/ml heparin, 1× Denhardt's) containing 0.5 µg ml<sup>-1</sup> RNA probes for 16~20 h at 60 °C water bath. After hybridization, the sections were sequentially washed with pre-hybridization solution for 30 min and 1:1 pre-hybridization solution / 1% TBST (500 mM NaCl, 20 mM Tris (pH 7.5) and 1% Tween 20 (vol/vol)) for 30 min at 60 °C. After that, the sections were rinsed sequentially with 1% TBST, 1:1 TBST / TAE (40 mM Tris-Acetate, 1 mM EDTA) and TAE at room temperature. Unbind RNAs were removed using electrophoresis (I = 80 mA) for 2 hours in TAE buffer followed by twice washes in 1% TBST. When immunostaining was combined with FISH, the sections were incubated with Anti-digoxigenin, AP-conjugate (1:500, Roche, #11093274910) and cFos primary antibody (1:5,000, Synaptic System, #226003) in Blocking buffer (0.5% Blocking reagent (Roche, #11096176001), 0.1 M Tris, 0.15 M NaCl) for 12h~24h at 4°C. Afterward, the sections were washed thrice with AGT buffer (1× PBS, 2 mM MgCl<sub>2</sub>, 0.1% Triton X-100, 0.5% Goat serum), and incubated with AGT buffer containing Alexa Fluor® 488 (1:500, Invitrogen, #A-11008) for detection of cFos protein signal. Finally, the RNA signal was detected by alkaline phosphatase activity using SIGMAFAST™ Fast Red

Tablets (Sigma, #F4648). When carrying out double RNA fluorescent in situ hybridization, BDNF probe was detected by AP system as described above, and Vgat or Vglut2 probes were detected as follows: after electrophoresis, sections were washed by TBST twice, then incubated with Anti-Fluorescein-HRP (1:2000, PerkinElmer, # NEF710) for 2 h at room temperature. Afterward, they were washed three times with TBST for 10 min. The fluorescein signal was amplified by TSA Plus DNP (HRP) System (PerkinElmer). Finally, the deposited fluorophores were visualized by anti-DNP, Alexa 488 conjugated (Invitrogen, #A-11097).

#### Supplemental References:

1. Luo J, Shen WL, & Montell C (2017) TRPA1 mediates sensation of the rate of temperature change in *Drosophila* larvae. *Nat Neurosci* 20(1):34-41.
2. Li Y, *et al.* (2016) Serotonin neurons in the dorsal raphe nucleus encode reward signals. *Nature communications* 7:10503-10517.
3. Pfeffer CK, Xue M, He M, Huang ZJ, & Scanziani M (2013) Inhibition of inhibition in visual cortex: the logic of connections between molecularly distinct interneurons. *Nature neuroscience* 16(8):1068-1076.
4. Padilla SL, *et al.* (2016) Agouti-related peptide neural circuits mediate adaptive behaviors in the starved state. *Nat Neurosci* 19(5):734-741.
5. Knight ZA, *et al.* (2012) Molecular profiling of activated neurons by phosphorylated ribosome capture. *Cell* 151(5):1126-1137.

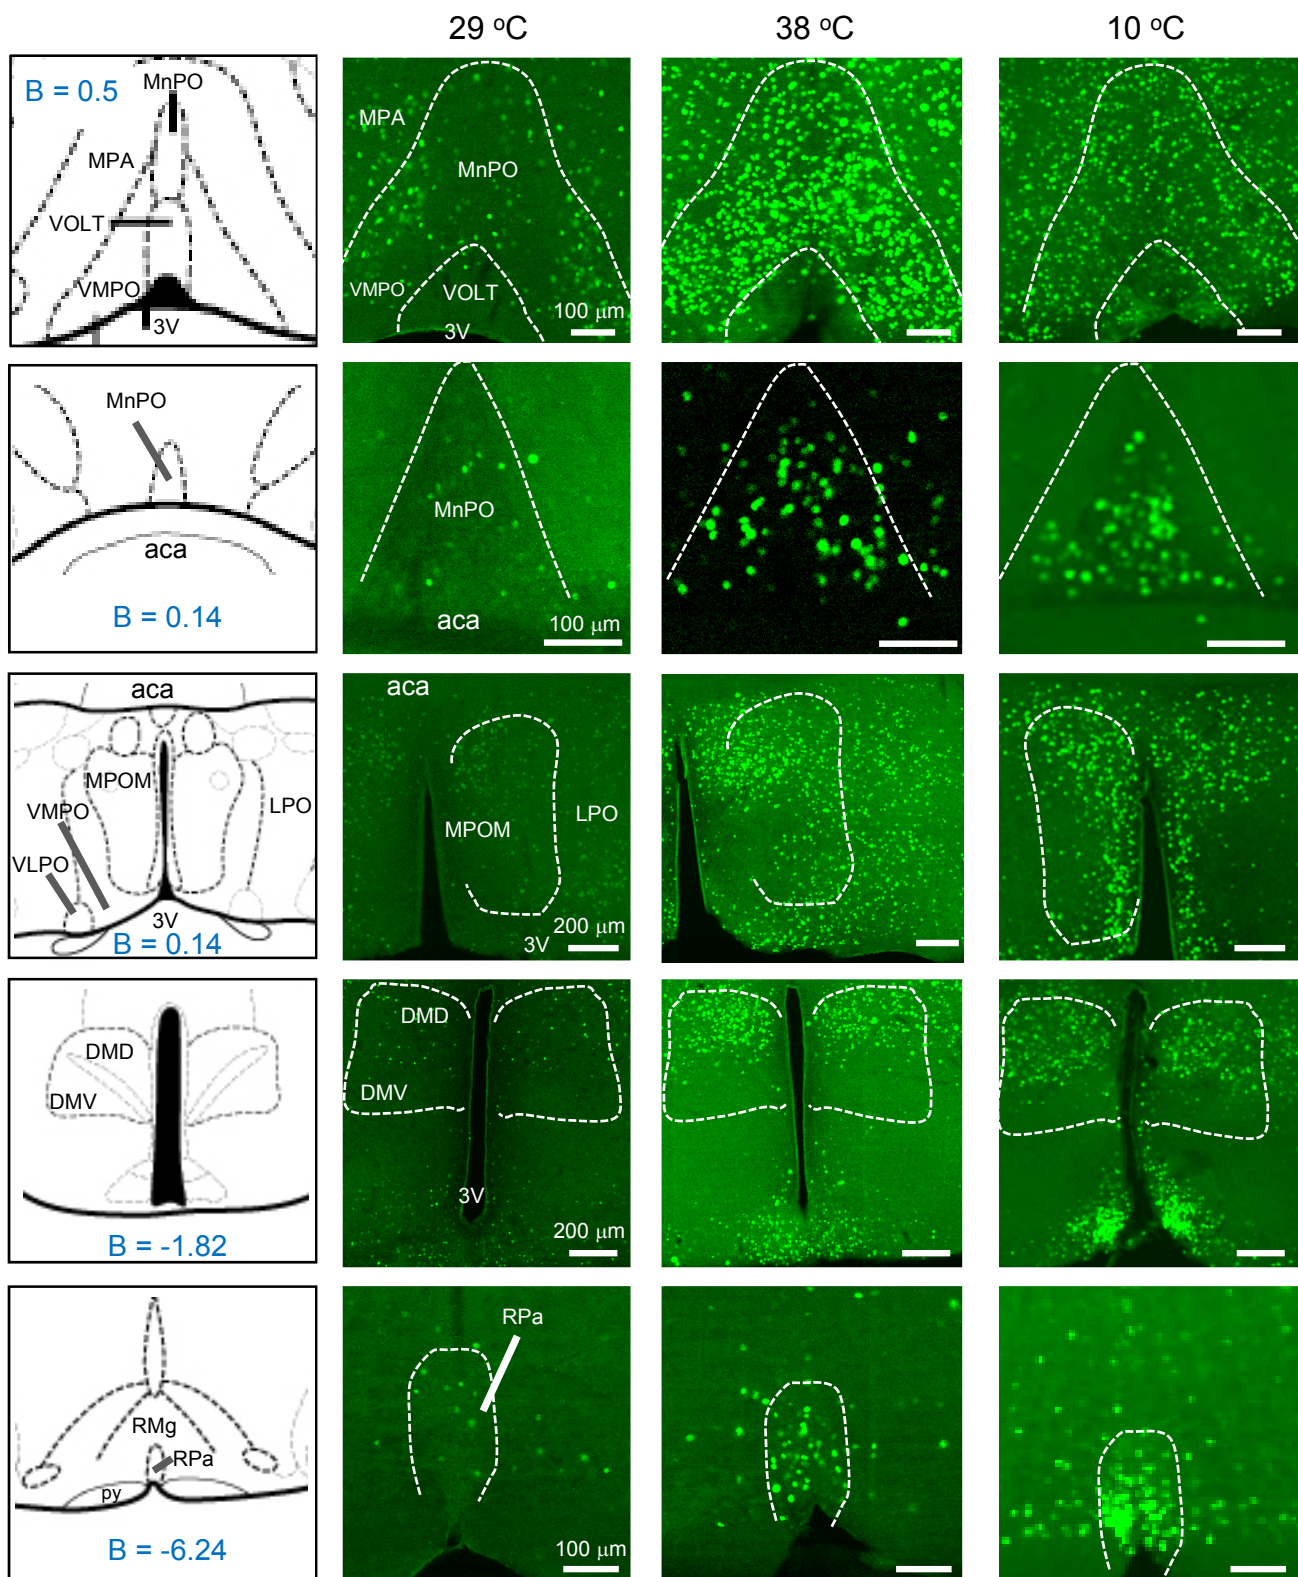

**Figure S1. Brain areas activated by thermal stimuli.**

Thermal neutral temperature (29 °C) was used as the control. cFos (in green) staining were seen in multiple areas after 2 h at indicated temperature. Brain coordinates and nomenclatures were according to *Mouse Brain in Stereotaxic Coordinates* (by Paxinos & Franklin, 2<sup>nd</sup> edition, 2001). Scale bars are indicated in the figure. B, Bregma; MPA, medial preoptic area; MnPO, median preoptic nucleus; VOLT, vascular organ of the lamina terminalis; VMPO, ventromedial preoptic nucleus; 3V, third ventricle; aca, anterior commissure, anterior part; MPOM, medial preoptic nucleus, medial part; LPO, lateral preoptic area; VLPO, ventrolateral preoptic nucleus; DMD, dorsomedial hypothalamic nucleus, dorsal Part; DMV, dorsomedial hypothalamic nucleus, ventral part; Rmg, raphe magnus nucleus; Rpa, raphe pallidus nucleus; py, pyramidal tract.

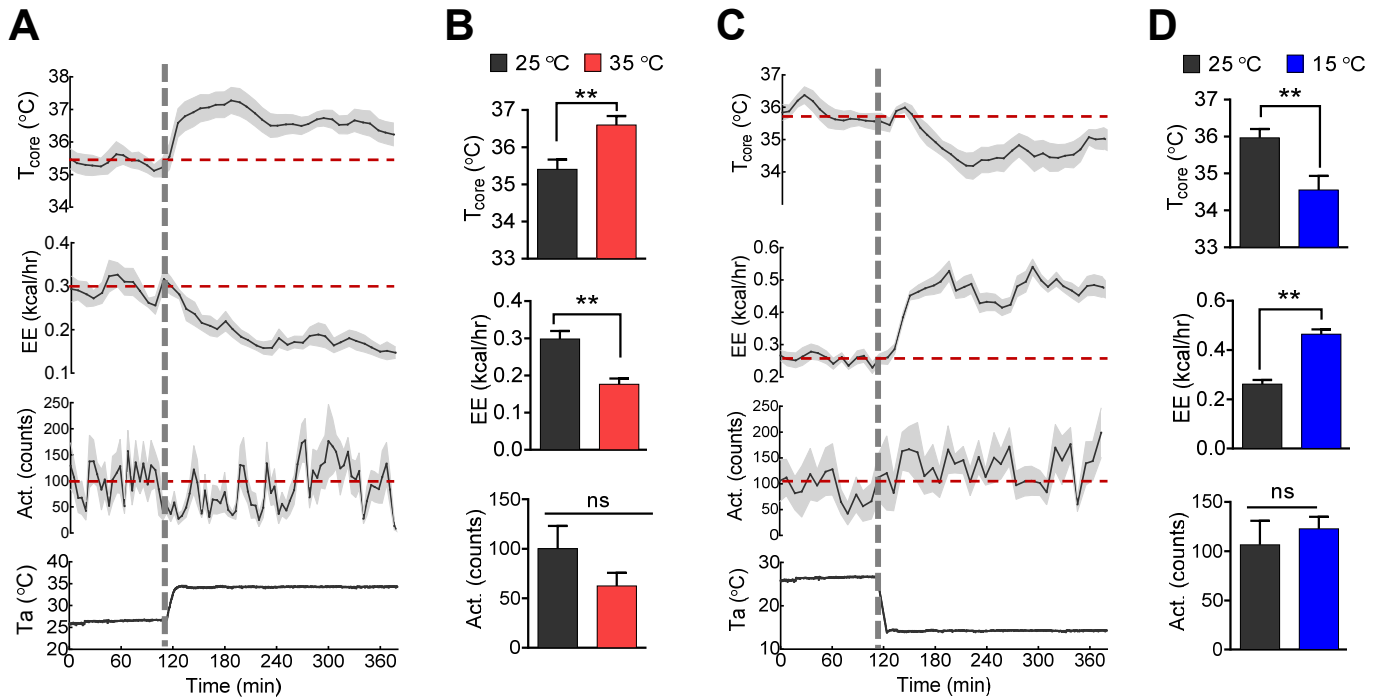

**Figure S2.  $T_{core}$ , EE and activity changes under different environmental temperature.**  
**A**, Changes of  $T_{core}$ , EE and activity over time under high ambient temperature ( $T_a$ , 25  $\rightarrow$  35  $^{\circ}$ C). ( $n = 8$  mice). **B**, The average of  $T_{core}$ , EE and activity at the indicated  $T_a$  during 1h interval. **C**, Changes of  $T_{core}$ , EE and activity over time under cold ambient temperature ( $T_a$ , 25  $\rightarrow$  15  $^{\circ}$ C). ( $n = 8$  mice). **D**, The average of  $T_{core}$ , EE and activity at the indicated  $T_a$  during 1 h interval. The time intervals used to calculate data shown in (**B**) and (**D**) are: 25  $^{\circ}$ C, 0 – 60 min; 35  $^{\circ}$ C, 240 – 300 min; 15  $^{\circ}$ C, 240 – 300 min). All data are plotted as mean  $\pm$  SEM. The p-values compared to control group (25  $^{\circ}$ C) are calculated using two-side unpaired t tests. \* $p \leq 0.05$ ; \*\*,  $p \leq 0.01$ ; ns, not significant.

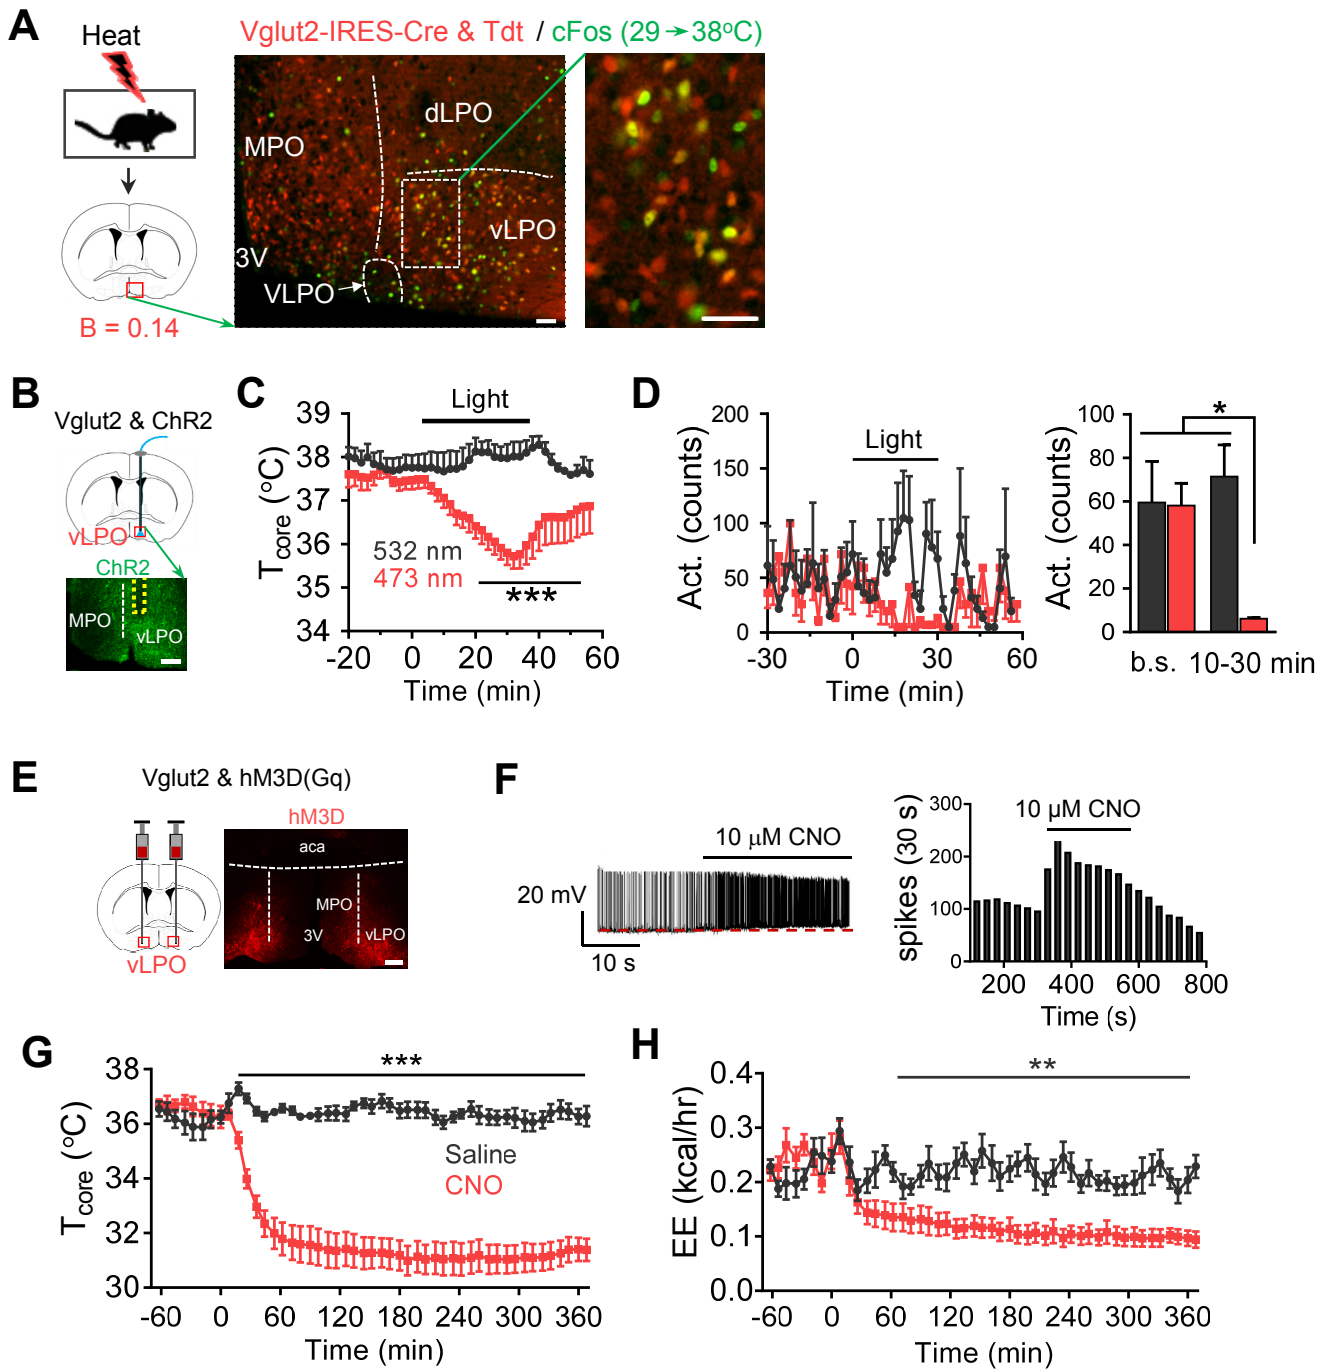

**Figure S3. Activation of vLPO glutamatergic neurons reduced body temperature.**

**A**, Heat ( $38^{\circ}\text{C}$ , 2h) induced cFos co-localized with glutamatergic markers (Vglut2-IRES-Cre, lox-tdTomato) in the vLPO. No. of cFos+ & Vglut2+ / No. of cFos+ =  $37.3 \pm 2.7\%$ . (n = 3). **B**, Scheme of optogenetic stimulation and viral expression of ChR2 in vLPO<sup>Vglut2</sup> neurons. **C-D**, Optogenetic activation of vLPO glutamatergic (Vglut2-IRES-Cre+) neurons by blue lights reduced  $T_{\text{core}}$  (**C**) and activity (**D**) (n = 4). Unilateral illumination, light pulses for 2 s (488 nm or 532 nm laser, 10 mW, 20 Hz, 40%) followed by a 2-s break, with the sequence repeating for 30 min. For activity (Act.), baselines (b.s.) represents the average of counts in between t = (-30 – -10 min). (10 – 30 min) represents the average of counts in between t = (10 – 30 min). **E**, Scheme of viral injection and expression of hM3D(Gq) in vLPO<sup>Vglut2</sup> neurons. **F**, Representative trace in the right shows bath application of CNO induced an increase in spontaneous firing rates in vLPO<sup>Vglut2</sup> & hM3D neurons. The quantification of spike numbers during 30 s period is shown in the right. **G-H**, Stimulation of vLPO<sup>Vglut2</sup> neurons by CNO (1.5 mg/kg body weight, i.p. at t = 0) strongly reduced  $T_{\text{core}}$  (**F**) and EE (**G**) (n = 7). Scale bars are 100  $\mu\text{m}$  in (**A**) and 200  $\mu\text{m}$  in (**B**) and (**E**). All data are plotted as mean  $\pm$  s.e.m.. The p-values compared to Saline group unless specified are calculated based on two-way ANOVA. \*, p-value  $\leq 0.05$ ; \*\*, p-value  $\leq 0.01$ ; \*\*\*, p-value  $\leq 0.001$ . B, bregma; 3V, third ventricle; aca, anterior commissure, anterior part; MPO, medial preoptic nucleus; dLPO and vLPO, dorsal and ventral part of lateral preoptic nucleus respectively; VLPO, ventrolateral preoptic nucleus.

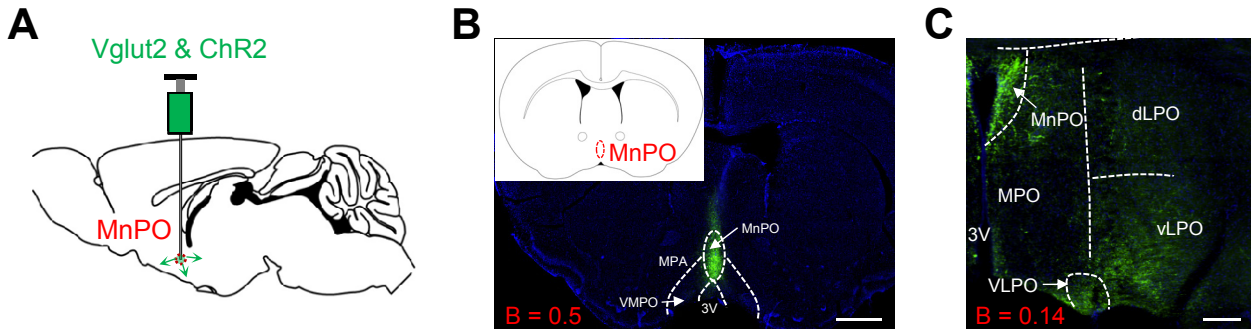

**Figure S4. The vLPO receives glutamatergic input from the MnPO.**

**A**, Scheme for anterograde tracing using ChR2. We injected 50 nl of Cre-dependent AAV5 viruses expressing ChR2-eYFP into the MnPO of Vglut2-IRES-Cre driver mice. **B**, Expression of ChR2-eYFP in MnPO<sup>Vglut2</sup> neurons. Cell bodies were seen in the MnPO (B = 0.5). **C**, Representative image showing nerve terminals in the vLPO derived from MnPO<sup>Vglut2</sup> neurons. The cell bodies were also seen in the MnPO (B = 0.14). Scale bars are 1 mm (**B**) and 200 μm (**C**). B, bregma; 3V, third ventricle; MnPO, median preoptic nucleus; MPO, medial preoptic nucleus; dLPO and vLPO, dorsal and ventral part of lateral preoptic nucleus respectively; VLPO, ventrolateral preoptic nucleus.

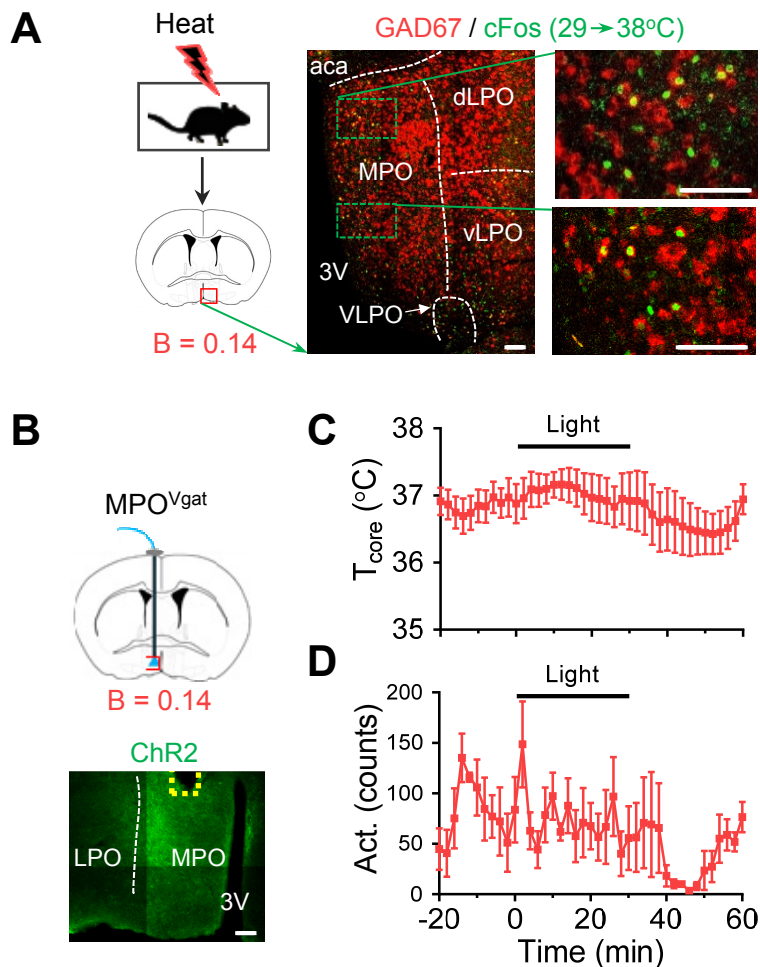

**Figure S5. Activation of MPO GABAergic neurons did not change body temperature.**

**A**, Heat-induced (38 °C, 2h) cFos co-localized with the GABAergic marker GAD67 in the MPO (No. of cFos+ & GAD67+ / No. of cFos+ =  $30 \pm 3.6\%$ ,  $n = 3$ ). **B**, Scheme of optogenetic stimulation and viral expression of ChR2 in MPO<sup>Vgat</sup> neurons. **C-D**, Optogenetic activation of MPO GABAergic neurons (Vgat-IRES-Cre+) by blue light did not significantly change  $T_{core}$  (**C**) and activity (**D**) ( $n = 3$ ). Unilateral illumination, light pulses for 2 s (488 nm laser, 10 mW, 20 Hz, 40%) followed by a 2-s break, with the sequence repeating for 30 min. Scale bars are 100  $\mu$ m in (**A**) and (**B**). All data are plotted as mean  $\pm$  s.e.m. B, bregma; 3V, third ventricle; aca, anterior commissure, anterior part; MPO, medial preoptic nucleus; dLPO and vLPO, dorsal and ventral part of lateral preoptic nucleus respectively; VLPO, ventrolateral preoptic nucleus.

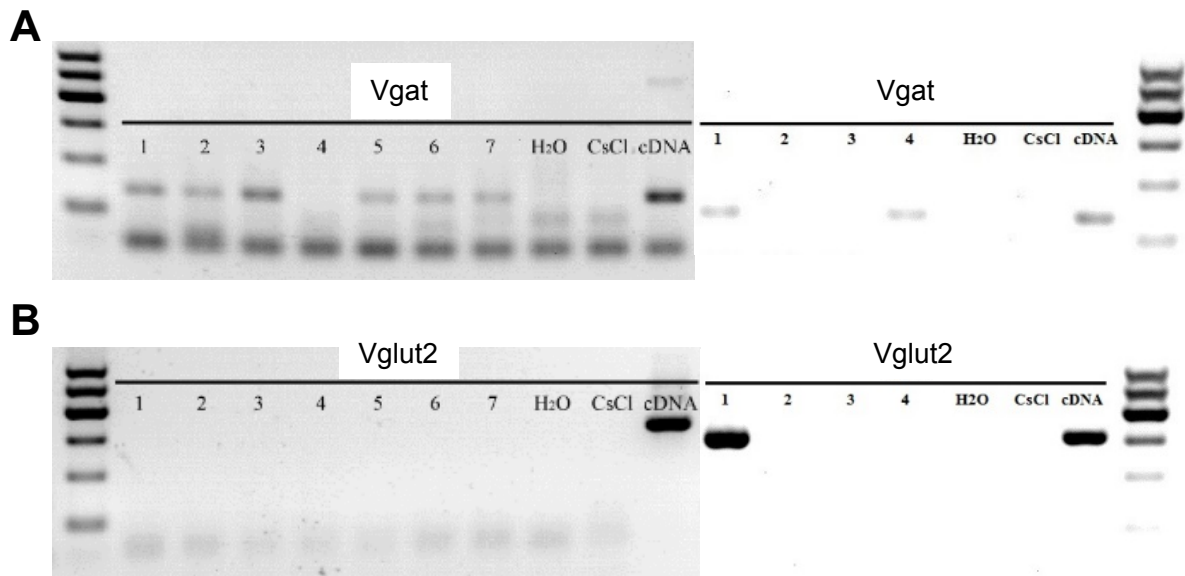

**Figure S6. Single-cell RT-PCR analysis (related to Fig. 2H).**

The intracellular fluid containing mRNAs was sucked directly using the recording pipette, reverse transcribed and amplified by two rounds of PCR reactions (from  $n = 3$  mice). **A**, The final PCR products for Vgat primers (band: 137 bp). **B**, The final PCR products for Vglut2 primers (band: 313 bp). DNA markers (upper to lower: 600, 500, 400, 300, 200, 100 bp). The cDNA library prepared from brain lysates was used as a positive control. H<sub>2</sub>O and CsCl buffer were negative controls.



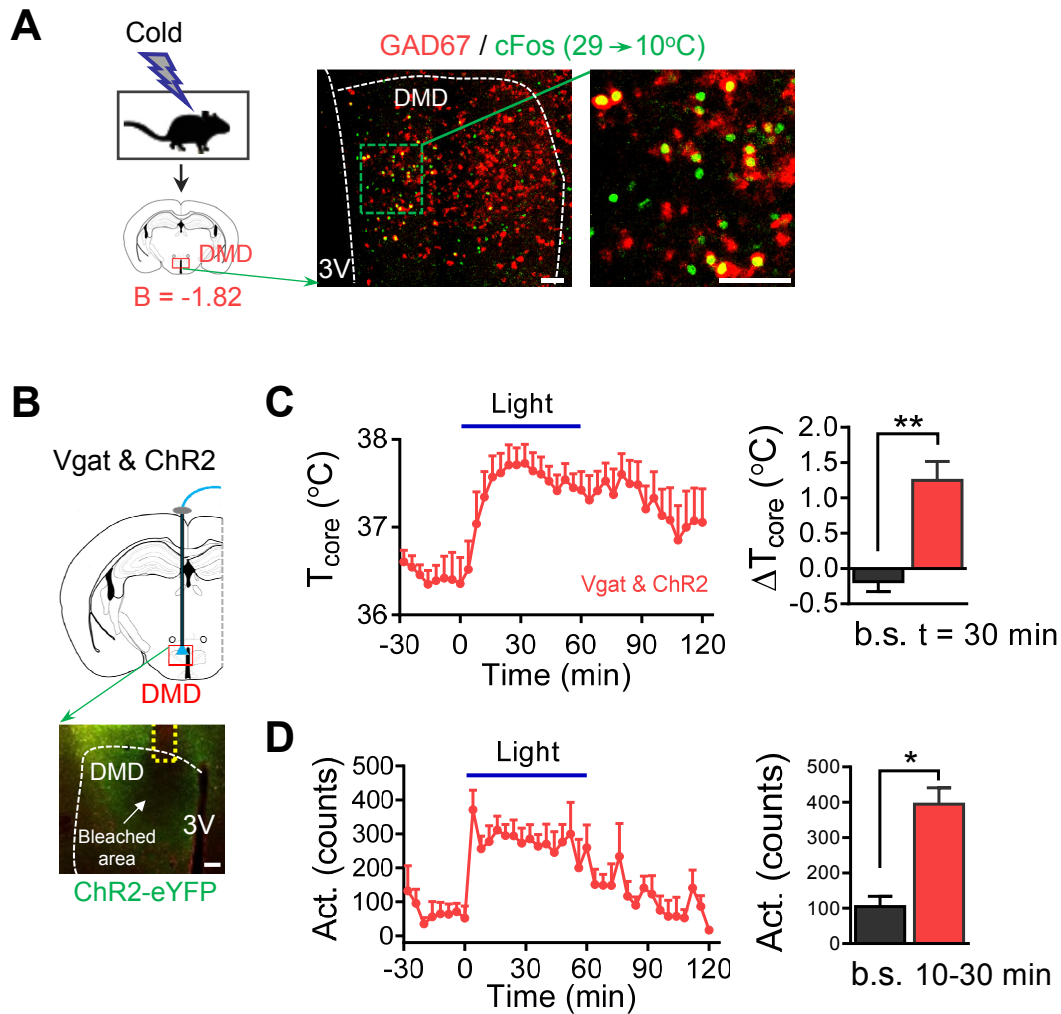

**Figure S7. Activation of DMD GABAergic neurons increases  $T_{core}$**

**A**, Cold-induced (10°C, 2h) cFos co-localized with GAD67 in the DMD. No. of cFos+ & GAD67+ / No. of cFos+ =  $57 \pm 3.2$  %. (n = 3). **B**, Schematic of optogenetic stimulation and representative image of viral expression of ChR2-eYFP in DMD GABAergic neurons (Vgat-IRES-Cre+). Mice were sacrificed right after optogenetic stimulation. The GFP fluorescence (without immunostaining) was bleached by laser illumination. The dashed yellow lines indicate the positions of optical inserts. The dashed white lines indicate boundaries between subregions. **C-D**, Optogenetic activation of DMD<sup>Vgat</sup> neurons (n = 4 mice) resulted in significant increases in  $T_{core}$  (**C**) and activity (**D**).  $\Delta T_{core}$  represents the  $T_{core}$  changes from the mean level before light delivery (t = -30 to -10 min). The time point t = -10 min (baseline, b.s.) and t = 30 min are in the bar graph. The average of activity in 20 min interval in between t = (-30 to -10 min) (baseline, b.s.) and in between t = (10-30 min) are shown in the bar graph. Stimulation protocol for ChR2: unilateral illumination, light pulses for 2 s (488 nm laser, 10 mW, 20 Hz, 40%) followed by a 2-s break, with the sequence repeating for 60 min. Scale bars in (**A**) and (**B**) are 100  $\mu$ m. The p-values compared to baseline are calculated based on two-tailed unpaired t tests. \*p-value  $\leq 0.05$ ; \*\*p-value  $\leq 0.01$ . B, bregma; 3V, third ventricle; DMD, dorsal part of dorsomedial hypothalamic nucleus.

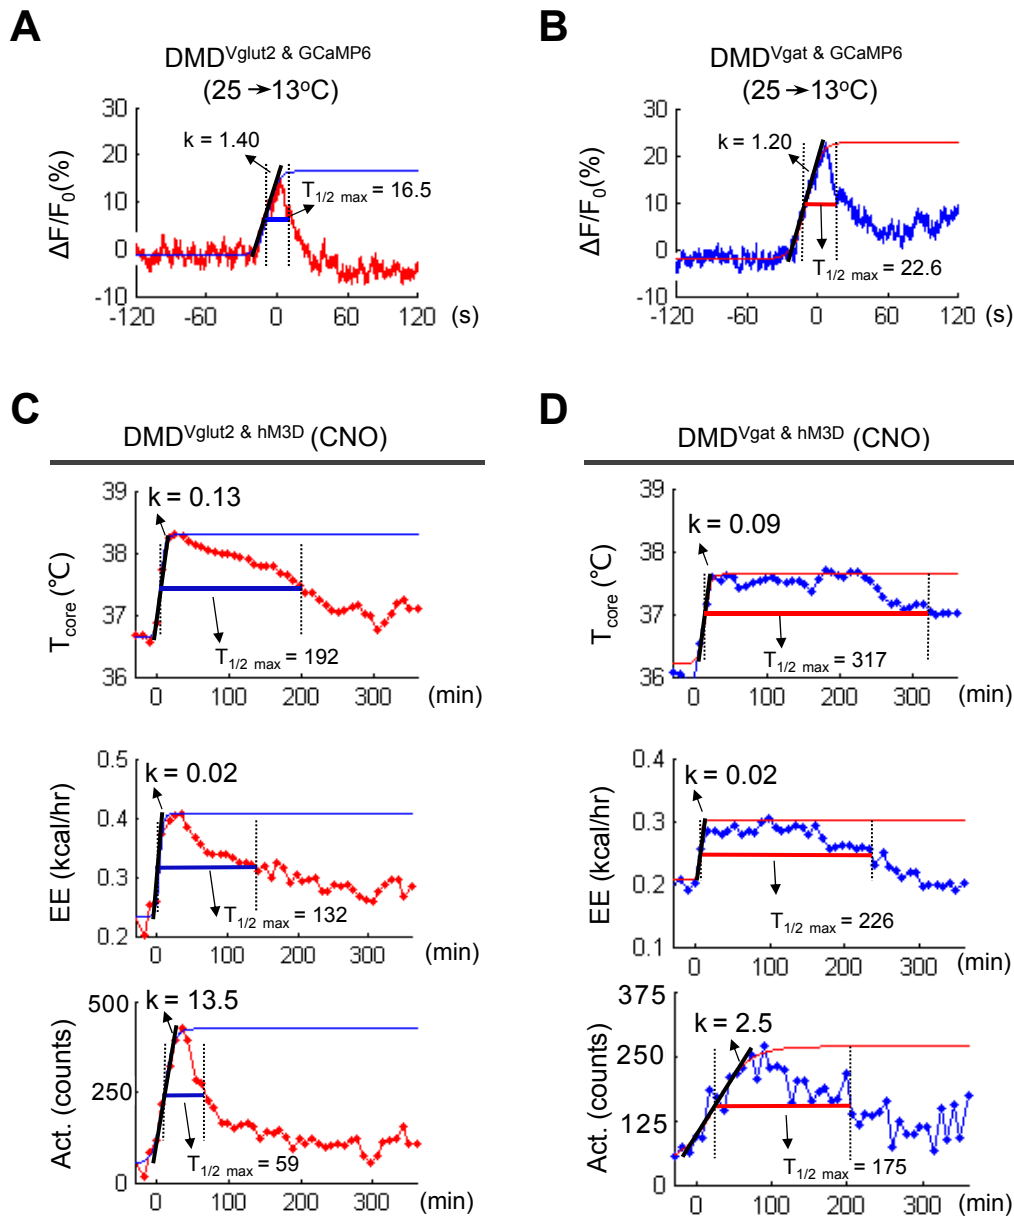

**Figure S8. Fitting of the response curve of by a sigmoidal function.**

**A-B**, Fitting of calcium transients from DMD<sup>Vglut2</sup> and DMD<sup>Vgat</sup> neurons in response to cooling as shown in Fig. 3D-E.  $k$  is the maximum change rate from the sigmoidal function.  $T_{1/2 \max}$  is the full width at half maximum (FWFM). **C-D**, Fitting of  $T_{\text{core}}$ , EE and activity curve from mice with DREADD activation of DMD<sup>Vglut2</sup> and DMD<sup>Vgat</sup> neurons (related to Fig. 4B-D,F-H). CNO injected at  $t = 0$ .

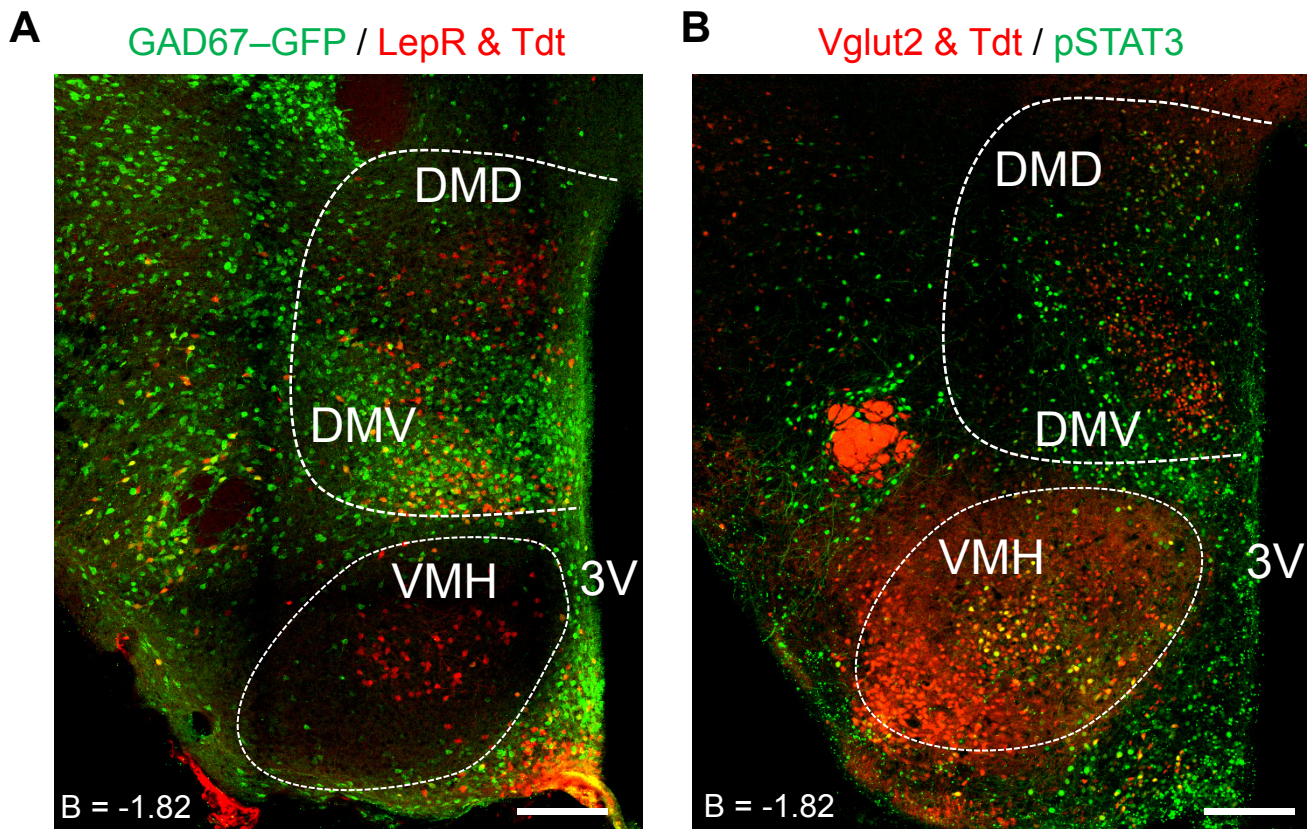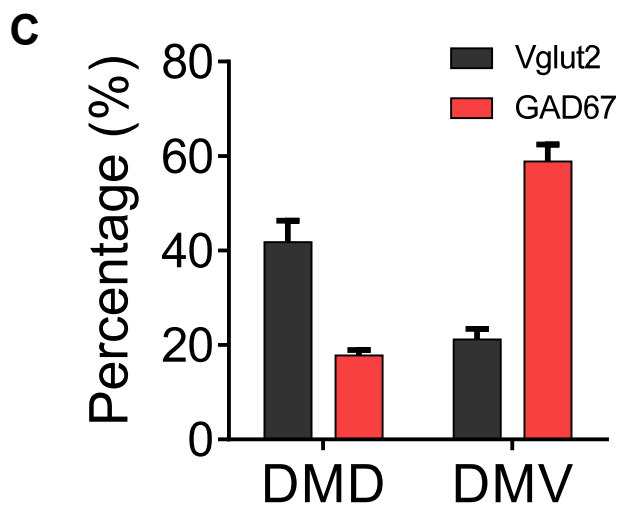

**Figure S9. LepR neurons in the DMH.**

**A**, Representative image of double immunostaining of GAD67-GFP and LepR (LepR-Cre, *lox-tdTomato*). The overlapping ratio is shown in **(C)**. **B**, Representative image of double immunostaining of Vglut2 (Vglut2-IRES-Cre, *lox-tdTomato*) and pSTAT3 after leptin injection (I.P. leptin, 4 mg/kg body weight). pSTAT3 is a positive indicator for leptin signaling. The overlapping ratio is shown in **(C)**. **C**, Quantification of overlapping ratio for **(A)** and **(B)**. No. of GAD67-GFP+ & LepR+ / No. of LepR+ cells in **(A)** is in red. No. of Vglut2+ & pSTAT3+ / No. of pSTAT3+ cells in **(B)** is in black. Scale bars in **(A)** and **(B)** are 200  $\mu$ m. B, bregma; DMD and DMV, dorsal and ventral part of dorsomedial hypothalamic nucleus respectively; 3V, third ventricle; VMH, ventromedial nucleus of the hypothalamus.

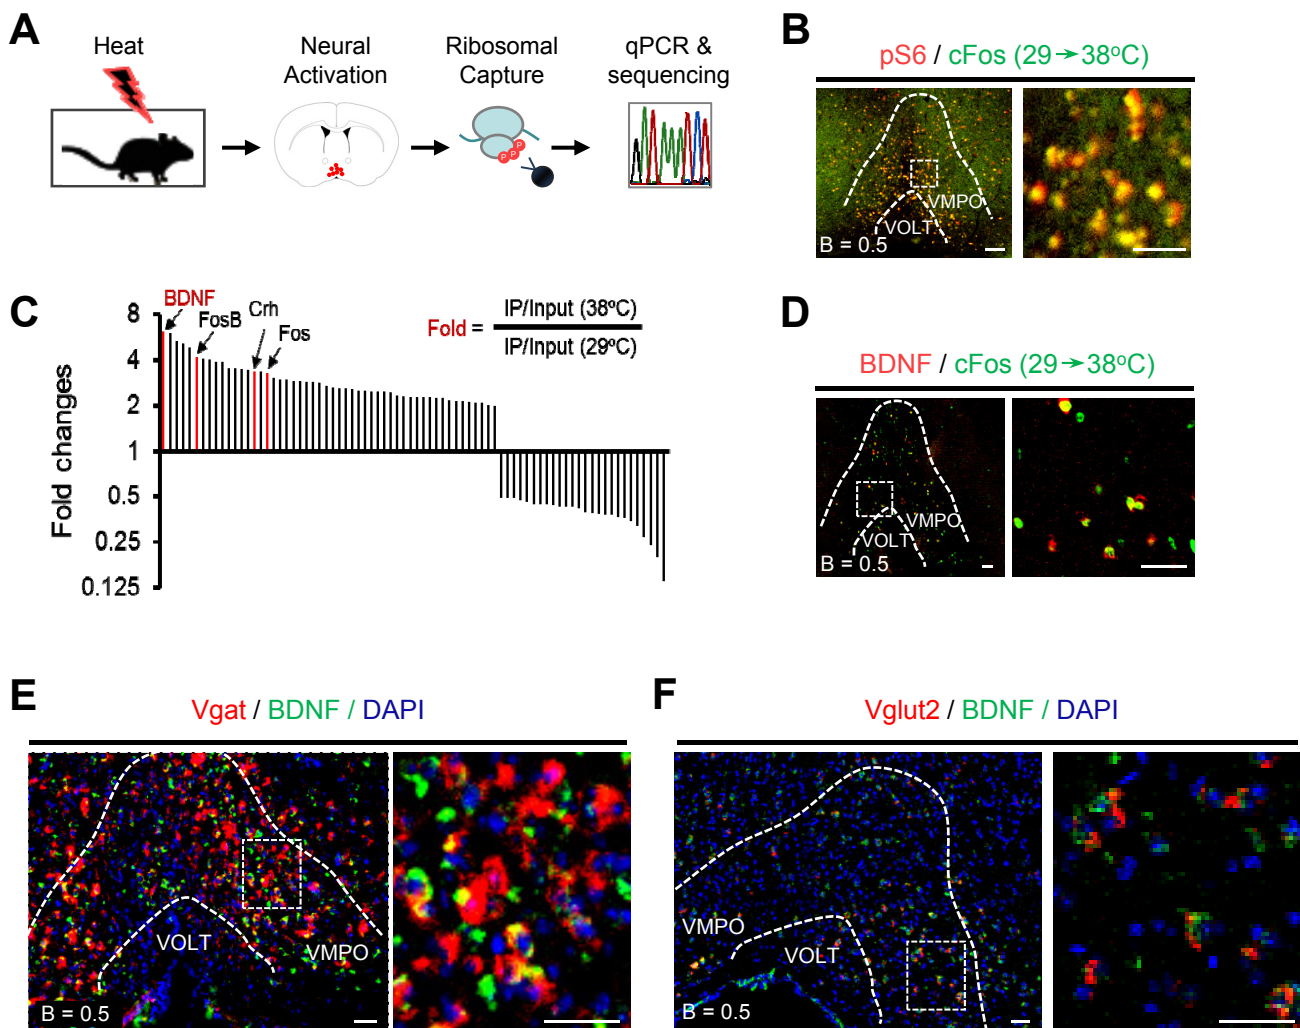

**Figure S10. Identification of BDNF as a novel marker for heat activated neurons.**

**A**, Scheme for phosphor-TRAP followed by mRNA sequencing. **B**, pS6 immune activity were colocalized with heat induced cFos in the POA. **C**, BDNF was highly enriched after heat induction (2h, 38 °C) based mRNA sequencing reads number. The genes are listed in Table S2. **D**, BDNF mRNAs co-localized with heat induced cFos in the POA. The overlapping ratio (No. of BDNF+ & cFos+ / No. of cFos+) in the VMPO is  $67.2 \pm 2.8\%$  ( $n = 3$ ). **E**, Double FISH analysis of Vgat and BDNF. The overlapping ratio (No. of BDNF+ & Vgat+ / No. of BDNF+) in the VMPO is 32.9 % ( $n = 2$ ). **F**, Double FISH analysis of Vglut2 and BDNF. The overlapping ratio (No. of BDNF+ & Vglut2+ / No. of BDNF+) in the VMPO is 59.8 % ( $n = 2$ ). Scale bars are 50  $\mu\text{m}$ . B, bregma; VMPO, ventromedial preoptic nucleus; VOLT, vascular organ of the lamina terminalis.

## Table S1. Summary of statistical analyses

| Figure              | Sample size (n) | Statistical test                                                                                                                                         | P values                                                                                                                           |
|---------------------|-----------------|----------------------------------------------------------------------------------------------------------------------------------------------------------|------------------------------------------------------------------------------------------------------------------------------------|
| 1D-Chr2             | 4 mice          | RM-two-way ANOVA.<br>Factor one: time<br>Factor two: treatment (control, Chr2)<br>Bonferroni's multiple comparisons test.                                | Time: F (40, 120) = 5.19, P < 0.0001<br>Treatment: F (1, 3) = 5.94, P = 0.09<br>Interaction: F (40, 120) = 0.71, P < 0.0001        |
| 1D-hGtACR           | 3 mice          | RM-two-way ANOVA.<br>Factor one: time<br>Factor two: treatment (control, hGtACR1)<br>Bonferroni's multiple comparisons test.                             | Time: F (40, 80) = 2.96, P < 0.0001<br>Treatment: F (1, 2) = 51.66, P = 0.02<br>Interaction: F (40, 80) = 9.81, P < 0.0001         |
| 1E-Chr2-bar graph   | 4 mice          | RM-two-way ANOVA.<br>Factor one: time bin (baseline, 20 – 30 min)<br>Factor two: treatment (control, Chr2)<br>Bonferroni's multiple comparisons test.    | Time bin: F (1, 3) = 28.88, P = 0.01<br>Treatment: F (1, 3) = 0.36, P = 0.59<br>Interaction, F (1, 3) = 9.56, P = 0.05             |
| 1E-hGtACR-bar graph | 3 mice          | RM-two-way ANOVA.<br>Factor one: time bin (baseline, 20 – 30 min)<br>Factor two: treatment (control, hGtACR1)<br>Bonferroni's multiple comparisons test. | Time bin: F (1, 2) = 52.33, P = 0.02<br>Treatment: F (1, 2) = 0.53, P = 0.54<br>Interaction: F (1, 2) = 27.29, P = 0.03            |
| 2E                  | 5 mice          | RM-two-way ANOVA.<br>Factor one: time<br>Factor two: treatment (473 nm, 532 nm)<br>Bonferroni's multiple comparisons test.                               | Time: F (49, 196) = 8.07, P < 0.0001<br>Treatment: F (1, 4) = 38.14, P = 0.004<br>Interaction: F (49, 196) = 7.99, P < 0.0001      |
| 2F                  | 5 mice          | Paired t test (two side)                                                                                                                                 | P = 0.04                                                                                                                           |
| 3D                  | 3 mice          | Paired t test (two side)                                                                                                                                 | 25-13:<br>0-10 vs b.s.: P < 0.001<br>110 -120 vs b.s.: P = 0.09<br>25-38:<br>0-10 vs b.s.: P = 0.27<br>110 -120 vs b.s.: P = 0.09  |
| 3E                  | 4 mice          | Paired t test (two side)                                                                                                                                 | 25-13:<br>0-10 vs b.s.: P < 0.001<br>110 -120 vs b.s.: P = 0.003<br>25-38:<br>0-10 vs b.s.: P = 0.26<br>110 -120 vs b.s.: P = 0.04 |
| 4B                  | 5 mice          | RM-two-way ANOVA.<br>Factor one: time<br>Factor two: treatment (Saline , CNO)<br>Bonferroni's multiple comparisons test.                                 | Time: F (27, 108) = 6.58, P < 0.0001<br>Treatment: F (1, 4) = 27.19, P = 0.006<br>Interaction: F (27, 108) = 8.01, P < 0.0001      |
| 4C                  | 5 mice          | RM-two-way ANOVA.<br>Factor one: time<br>Factor two: treatment (Saline , CNO)<br>Bonferroni's multiple comparisons test.                                 | Time: F (27, 108) = 6.24, P < 0.0001<br>Treatment: F (1, 4) = 75.66, P = 0.001<br>Interaction: F (27, 108) = 8.58, P < 0.0001      |
| 4D                  | 5 mice          | RM-two-way ANOVA.<br>Factor one: time<br>Factor two: treatment (Saline , CNO)<br>Bonferroni's multiple comparisons test.                                 | Time: F (27, 108) = 6.16, P < 0.0001<br>Treatment: F (1, 4) = 76.60, P = 0.0009<br>Interaction: F (27, 108) = 7.23, P < 0.0001     |
| 4F                  | 8 mice          | RM-two-way ANOVA.<br>Factor one: time<br>Factor two: treatment (Saline , CNO)<br>Bonferroni's multiple comparisons test.                                 | Time: F (34, 238) = 12.69, P < 0.0001<br>Treatment: F (1, 7) = 61.97, P = 0.0001<br>Interaction: F (34, 238) = 7.15, P < 0.0001    |
| 4G                  | 8 mice          | RM-two-way ANOVA.<br>Factor one: time<br>Factor two: treatment (Saline , CNO)<br>Bonferroni's multiple comparisons test.                                 | Time: F (34, 238) = 4.63, P < 0.0001<br>Treatment: F (1, 7) = 27.57, P = 0.001<br>Interaction: F (34, 238) = 2.85, P < 0.0001      |
| 4H                  | 8 mice          | RM-two-way ANOVA.<br>Factor one: time<br>Factor two: treatment (Saline , CNO)<br>Bonferroni's multiple comparisons test.                                 | Time: F (34, 238) = 4.31, P < 0.0001<br>Treatment: F (1, 7) = 47.29, P = 0.0002<br>Interaction: F (34, 238) = 5.49, P < 0.0001     |

|    |        |                          |           |
|----|--------|--------------------------|-----------|
| 5A | 4 mice | Paired t test (two side) | P = 0.009 |
| 5B | 4 mice | Paired t test (one side) | P = 0.04  |
| 5C | 4 mice | Paired t test (two side) | P = 0.003 |
| 5D | 4 mice | Paired t test (one side) | P = 0.04  |

**Table S2. Enriched or depleted genes after heat challenge (from pS6-TRAP).**

| <b>Symbol</b> | <b>Definition</b>                                                                                 | <b>Fold change</b> |
|---------------|---------------------------------------------------------------------------------------------------|--------------------|
| Bdnf          | brain derived neurotrophic factor                                                                 | 6.09               |
| Rrad          | Ras-related associated with diabetes                                                              | 6.06               |
| Npas4         | neuronal PAS domain protein 4                                                                     | 5.25               |
| Apold1        | apolipoprotein L domain containing 1                                                              | 5.12               |
| Fosl1         | fos-like antigen 1                                                                                | 4.87               |
| Fosb          | FBJ osteosarcoma oncogene B                                                                       | 4.14               |
| Calml4        | calmodulin-like 4                                                                                 | 4.07               |
| Serinc2       | serine incorporator 2                                                                             | 4.02               |
| Inhba         | inhibin beta-A                                                                                    | 3.87               |
| Junb          | jun B proto-oncogene                                                                              | 3.87               |
| Csmp1         | cysteine-serine-rich nuclear protein 1                                                            | 3.56               |
| Gem           | GTP binding protein                                                                               | 3.51               |
| Crem          | cAMP responsive element modulator                                                                 | 3.44               |
| Nr4a3         | nuclear receptor subfamily 4, group A, member 3                                                   | 3.39               |
| Crh           | corticotropin releasing hormone                                                                   | 3.37               |
| Fos           | FBJ osteosarcoma oncogene                                                                         | 3.27               |
| Nr4a1         | nuclear receptor subfamily 4, group A, member 1                                                   | 2.95               |
| Fam90a1b      | family with sequence similarity 90, member A1B                                                    | 2.95               |
| Igfbpl1       | insulin-like growth factor binding protein-like 1                                                 | 2.92               |
| Sertad1       | SERTA domain containing 1                                                                         | 2.92               |
| Adcyap1       | adenylate cyclase activating polypeptide 1                                                        | 2.84               |
| Slc37a2       | solute carrier family 37 (glycerol-3-phosphate transporter), member 2                             | 2.84               |
| Nms           | neuromedin S                                                                                      | 2.79               |
| Gal           | galanin                                                                                           | 2.64               |
| Dusp14        | dual specificity phosphatase 14                                                                   | 2.58               |
| Yap1          | yes-associated protein 1                                                                          | 2.54               |
| Nts           | neurotensin                                                                                       | 2.52               |
| Galr1         | galanin receptor 1                                                                                | 2.52               |
| Cdkn1a        | cyclin-dependent kinase inhibitor 1A (P21)                                                        | 2.50               |
| Gabre         | gamma-aminobutyric acid (GABA) A receptor, subunit epsilon                                        | 2.48               |
| Diap3         | diaphanous homolog 3 (Drosophila)                                                                 | 2.47               |
| Btg2          | B cell translocation gene 2, anti-proliferative                                                   | 2.46               |
| Skap1         | src family associated phosphoprotein 1                                                            | 2.33               |
| Cebpb         | CCAAT/enhancer binding protein (C/EBP), beta                                                      | 2.28               |
| Egr1          | early growth response 1                                                                           | 2.26               |
| Dnajc25       | DnaJ (Hsp40) homolog, subfamily C, member 25                                                      | 2.26               |
| Dusp1         | dual specificity phosphatase 1                                                                    | 2.26               |
| Fosl2         | fos-like antigen 2                                                                                | 2.26               |
| Mago          | mago homolog, exon junction complex core component                                                | 2.23               |
| Tnfrsf12a     | tumor necrosis factor receptor superfamily, member 12a                                            | 2.23               |
| Tmc3          | transmembrane channel-like gene family 3                                                          | 2.15               |
| Col8a1        | collagen, type VIII, alpha 1                                                                      | 2.14               |
| Gadd45b       | growth arrest and DNA-damage-inducible 45 beta                                                    | 2.11               |
| Rps2-ps6      | ribosomal protein S2, pseudogene 6                                                                | 2.08               |
| Cd36          | CD36 antigen                                                                                      | 2.07               |
| F2rl2         | coagulation factor II (thrombin) receptor-like 2                                                  | 2.03               |
| Ier3          | immediate early response 3                                                                        | 2.00               |
| Adgre5        | adhesion G protein-coupled receptor E5                                                            | 0.50               |
| Slc6a13       | solute carrier family 6 (neurotransmitter transporter, GABA), member 13                           | 0.50               |
| Fpgs          | folylpolyglutamyl synthetase                                                                      | 0.50               |
| Fam72a        | family with sequence similarity 72, member A                                                      | 0.48               |
| Fbn2          | fibrillin 2                                                                                       | 0.46               |
| Plcb3         | phospholipase C, beta 3                                                                           | 0.45               |
| Brsk1         | BR serine/threonine kinase 1                                                                      | 0.45               |
| Serpina9      | serine (or cysteine) peptidase inhibitor, clade A (alpha-1 antiproteinase, antitrypsin), member 9 | 0.44               |
| Akap1         | A kinase (PRKA) anchor protein 1                                                                  | 0.44               |
| Tmem173       | transmembrane protein 173                                                                         | 0.43               |
| Pmch          | pro-melanin-concentrating hormone                                                                 | 0.43               |
| Kif26a        | kinesin family member 26A                                                                         | 0.43               |
| Ddx58         | DEAD (Asp-Glu-Ala-Asp) box polypeptide 58                                                         | 0.42               |
| Alas2         | aminolevulinic acid synthase 2, erythroid                                                         | 0.40               |
| Fam83d        | family with sequence similarity 83, member D                                                      | 0.39               |
| Spg11         | spastic paraplegia 11                                                                             | 0.38               |
| Hck           | hemopoietic cell kinase                                                                           | 0.38               |
| Svil          | supervillin                                                                                       | 0.38               |
| Dapp1         | dual adaptor for phosphotyrosine and 3-phosphoinositides 1                                        | 0.37               |
| Sdc1          | syndecan 1                                                                                        | 0.33               |
| Cfh           | complement component factor h                                                                     | 0.27               |
| Chst3         | carbohydrate (chondroitin 6/keratan) sulfotransferase 3                                           | 0.24               |
| Foxc1         | forkhead box C1                                                                                   | 0.20               |
| Col1a1        | collagen, type I, alpha 1                                                                         | 0.14               |
